# Supplementary material for: Transcription-induced formation of paired Al sites in high-silica CHA-type zeolite framework using Al-rich amorphous aluminosilicate
Source: Royal Society of Chemistry journal article supplement (doi:10.1039/d1cc05401e), 2021-01-01
Supplement: d1cc05401e1.pdf [file d1cc05401e1.pdf]

## Electronic Supplementary Information

### Transcription-induced formation of paired Al sites in high-silica CHA-type zeolite framework using Al-rich amorphous aluminosilicate

Mizuho Yabushita,<sup>\*,a</sup> Yoshiyasu Imanishi,<sup>§,b</sup> Ting Xiao,<sup>§,b,c</sup> Ryota Osuga,<sup>b</sup> Toshiki Nishitoba,<sup>§§,d</sup>  
Sachiko Maki,<sup>b,e</sup> Kiyoshi Kanie,<sup>b,e</sup> Wenbin Cao,<sup>c</sup> Toshiyuki Yokoi,<sup>d</sup> Atsushi Muramatsu<sup>\*,b,e,f</sup>

<sup>a</sup>*Department of Applied Chemistry, School of Engineering, Tohoku University, 6-6-07 Aoba, Aramaki, Aoba-ku, Sendai, Miyagi 980-8579, Japan*

<sup>b</sup>*Institute of Multidisciplinary Research for Advanced Materials, Tohoku University, 2-1-1 Katahira, Aoba-ku, Sendai, Miyagi 980-8577, Japan*

<sup>c</sup>*Department of Inorganic Nonmetallic Materials, School of Materials Science and Engineering, University of Science and Technology Beijing, Beijing 100083, China*

<sup>d</sup>*Institute of Innovative Research, Tokyo Institute of Technology, 4259 Nagatsuta-cho, Midori-ku, Yokohama, Kanagawa 226-8503, Japan*

<sup>e</sup>*International Center for Synchrotron Radiation Innovation Smart, Tohoku University, 2-1-1 Katahira, Aoba-ku, Sendai, Miyagi 980-8577, Japan*

<sup>f</sup>*Core Research for Evolutional Science and Technology, Japan Science and Technology Agency, 4-1-8 Honcho, Kawaguchi, Saitama 332-0012, Japan*

*\*Corresponding authors: m.yabushita@tohoku.ac.jp (M.Y.); mura@tohoku.ac.jp (A.M.)*

*§These authors contributed equally to this work.*

*§§Current address: National Institute of Advanced Industrial Science and Technology, 1-1-1 Higashi, Tsukuba Central 5, Tsukuba, Ibaraki 305-8565, Japan*

## Table of Contents

|                                                                                                                                  |     |
|----------------------------------------------------------------------------------------------------------------------------------|-----|
| 1. Experimental .....                                                                                                            | S3  |
| 2. Fig. S1 Procedure for synthesizing CHA- <i>t</i> <sub>2</sub> samples.....                                                    | S6  |
| 3. Fig. S2 Textural properties of Al-rich aluminosilicate prepared via the polymerized<br>complex method.....                    | S7  |
| 4. Table S1 Proportion of Q <sup>4</sup> (nAl) species in amorphous Al-rich aluminosilicate. ....                                | S7  |
| 5. Fig. S3 N <sub>2</sub> physisorption isotherms for CHA- <i>t</i> <sub>2</sub> . ....                                          | S8  |
| 6. Fig. S4 Coordination structure of Al and Si species involved in CHA- <i>t</i> <sub>2</sub> . ....                             | S9  |
| 7. Fig. S5 Deconvolution results for <sup>29</sup> Si MAS NMR spectra for CHA- <i>t</i> <sub>2</sub> .....                       | S10 |
| 8. Table S2 Proportion of Al-containing Q <sup>4</sup> (nAl) species in high-silica CHA-type zeolites<br>in reported works. .... | S11 |
| 9. Fig. S6 Characterization data of SSZ-13.....                                                                                  | S12 |
| 10. Supplementary references .....                                                                                               | S13 |

## Experimental

### 1. Reagents

All the reagents and gases listed here were used as-received without further purification. Tetraethyl orthosilicate (TEOS; Kojundo Chemical Laboratory), propylene glycol (PG; FUJIFILM Wako Pure Chemical), an aqueous HNO<sub>3</sub> solution (1 M, FUJIFILM Wako Pure Chemical), Al(NO<sub>3</sub>)<sub>3</sub>•9H<sub>2</sub>O (FUJIFILM Wako Pure Chemical), Al(OH)<sub>3</sub> (Sigma-Aldrich), citric acid (CA; anhydrous, Nacalai Tesque), ethylene glycol (EG; FUJIFILM Wako Pure Chemical), silica gel (Carplex BS-304F, DSL, Japan), fumed silica (Cab-O-Sil M5, Cabot), an aqueous NaOH solution (8 M, FUJIFILM Wako Pure Chemical), an aqueous *N,N,N*-trimethyl-1-adamantylammonium hydroxide solution (TMAdaOH, 25 wt%, SACHEM) and NH<sub>4</sub>NO<sub>3</sub> (FUJIFILM Wako Pure Chemical) were the reagents for synthesizing the Al-rich amorphous aluminosilicate and **CHA**-type zeolites. All gases were obtained from Taiyo Nippon Sanso. For the quantitative analysis for Si and Al in each sample as well as Sr<sup>2+</sup> in ion-exchange experiments, an aqueous HF solution (50 wt%, FUJIFILM Wako Pure Chemical) was used. In the ion-exchange experiment for Sr<sup>2+</sup>, SrCl<sub>2</sub>•6H<sub>2</sub>O (FUJIFILM Wako Pure Chemical) was used as a solute.

### 2. Synthesis of Al-rich amorphous aluminosilicate via polymerized complex method

The Al-rich amorphous aluminosilicate samples that were employed as precursors to zeolites in the hydrothermal process were prepared via the polymerized complex method.<sup>S1,S2</sup> To prevent the undesired evaporation and hydrolysis of TEOS, this compound was initially converted to propylene glycol-modified silane (PGMS),<sup>S3</sup> which ensured ease of handling. Thus, a mixture of 0.1 mol of TEOS and 0.4 mol of PG was stirred in an oil bath at 353 K for 24 h. Then, 1 mL of an aqueous HNO<sub>3</sub> solution (1 M) was added into the mixture, which was stirred further at 353 K for 1 h. The colorless, transparent solution was transferred into a 200 mL volumetric flask and diluted with deionized water to obtain a 0.5 M aqueous PGMS solution.

The thus-prepared aqueous PGMS solution, EG, and CA were charged into a 500 mL beaker and mixed at 333 K until a transparent solution was obtained. Then, Al(NO<sub>3</sub>)<sub>3</sub>•9H<sub>2</sub>O was added, and the entire mixture was stirred at the same temperature until all solids were completely dissolved. The molar ratio of PGMS, Al(NO<sub>3</sub>)<sub>3</sub>•9H<sub>2</sub>O, CA, and EG was 2/1/16/48. The mixture was heated at 373 K for *ca.* 1 h to remove water, and subsequently at 423 K to induce condensation between EG and CA, yielding a resin containing Si and Al atoms. Afterwards, the temperature was increased gradually from 423 to 723 K to carbonize the resin. The resulting black powder, a composite of aluminosilicate and carbonized resin, was calcined in an electric furnace in air at 1073 K for 12 h to remove the carbonized resin. The actual Si/Al ratio of the thus-prepared amorphous aluminosilicate specimen was determined by inductively coupled plasma-atomic emission spectroscopy (ICP-AES) to be 2.5 after complete dissolution in an aqueous HF solution (the detailed procedure for ICP-AES is described below).<sup>S2</sup>

### 3. Hydrothermal synthesis of CHA-type zeolites from Al-rich amorphous aluminosilicate

CHA-type zeolites were synthesized hydrothermally using an Al-rich amorphous aluminosilicate under seed-assisted conditions. Initially, silica gel (Carplex BS-304F), as an additional Si source to control the Si/Al ratio in the synthesis gels, an aqueous NaOH solution, an aqueous TMAdaOH solution, as an organic structure-directing agent, and deionized water were charged into a Teflon-lined high-pressure reactor (Model 4749 General Purpose Acid Digestion Vessels, Parr Instrument Company, inner volume 23 mL) with molar ratios of Si/Al/NaOH/TMAdaOH/H<sub>2</sub>O = 1/0.10/0.44/0.20/30. The mixture was stirred at room temperature for  $t_1$  hours. After the addition of the amorphous aluminosilicate into the mixture as a source of both Si and Al, the resulting synthesis gel was further aged at room temperature for  $t_2$  hours. Note that in all cases, the total aging time (*i.e.*,  $t_1 + t_2$ ) was kept constant at 48 h. Just before the hydrothermal treatment, a seed crystal (whose loading corresponded to 5 wt% against the total weight of SiO<sub>2</sub>) was added into the mixture. The hydrothermal process was conducted using an electric furnace (HIRO Company, pre-heated at 443 K to minimize the temperature ramp time) at a tumbling speed of 40 rpm at 443 K for 5 days. After cooling to room temperature, the solid product was separated and washed with deionized water by centrifugation at 15,000 rpm (this washing process was performed three times), dried at 333 K overnight, and calcined in air at 873 K for 12 h to remove TMAdaOH and obtain CHA-type zeolites.

### 4. Hydrothermal synthesis of CHA-type zeolites (SSZ-13) from SiO<sub>2</sub> and Al(OH)<sub>3</sub>

A control CHA-type zeolite specimen, labeled SSZ-13, was synthesized via a previously reported approach using fumed silica (Cab-O-Sil M5) and Al(OH)<sub>3</sub> as starting reagents.<sup>S4</sup> Into a Teflon-lined high-pressure reactor, deionized water, an aqueous NaOH solution, an aqueous TMAdaOH solution, Al(OH)<sub>3</sub>, and fumed silica were charged in a stepwise manner. The mixture was aged at room temperature for 1 h. After the addition of a seed crystal (whose loading corresponded to 5 wt% against the total weight of SiO<sub>2</sub>), the hydrothermal process was conducted in an electric furnace (pre-heated at 443 K to minimize the temperature ramp time) at a tumbling speed of 40 rpm at 423 K for 5 days. After cooling to room temperature, the solid product was separated and washed with deionized water through centrifugation (this washing process was performed three times), dried at 333 K overnight, and calcined in air at 873 K for 6 h to obtain SSZ-13.

### 5. Characterization of synthesized samples

The Si and Al contents were determined by ICP-AES (SPECTRO ARCOS, AMETEK). Prior to analysis, each sample was dissolved completely in 3 mL of an aqueous HF solution (50 wt%) at room temperature, followed by the addition of 47 mL of deionized water and a further 10-fold dilution. The crystal structure was analyzed by powder X-ray diffraction measurement (XRD; Ultima IV, Rigaku,

equipped with a semiconductor detector, Cu K $\alpha$  radiation at 40 kV and 40 mA, scan speed 2.0° min<sup>-1</sup>). The porous structure and surface area based on the Brunauer-Emmett-Teller (BET) equation were determined by N<sub>2</sub> physisorption measurement in a relative pressure ( $p/p_0$ ) range of 0.005–0.995 at 77 K using an automated apparatus (BELSORP-mini II, MicrotracBEL). Before physisorption measurements, each sample was heat-treated at 423 K for 4 h below 10 Pa. The nature of the Al and Si atoms was elucidated by solid-state <sup>27</sup>Al magic angle spinning nuclear magnetic resonance (<sup>27</sup>Al MAS NMR) and <sup>29</sup>Si MAS NMR with/without the cross polarization (CP) technique using an NMR spectrometer (JNM-ECA600, JEOL, <sup>27</sup>Al 156 MHz, <sup>29</sup>Si 119 MHz, MAS frequency 15 kHz). The <sup>29</sup>Si MAS NMR spectra were deconvoluted by the mixed Gaussian-Lorentzian functions using the OriginPro 2020b version 9.7.5.184 software.

## 6. Ion exchange of Sr<sup>2+</sup> over CHA-type zeolites

To prevent the effects of a class of counter cations, each CHA-type zeolite sample was subjected to ion-exchange treatment prior to the Sr<sup>2+</sup> adsorption experiment. Thus, 100 mg of CHA zeolite was dispersed in 100 mL of an aqueous NH<sub>4</sub>NO<sub>3</sub> solution (2 M). The suspension was ultrasonicated for 1 min to achieve a better dispersion of the adsorbent particles, and stirred at 353 K for 3 h. After separation and washing with deionized water by centrifugation, the resulting sample was treated in the same manner once more. After drying at 333 K overnight and calcination at 873 K for 6 h, a CHA-type zeolite sample containing H<sup>+</sup> as counter cation was obtained.

For the ion exchange of Sr<sup>2+</sup> over CHA-type zeolites, 100 mg of the thus-prepared CHA zeolite was dispersed in 10 mL of an aqueous SrCl<sub>2</sub> solution (50 mM). After ultrasonication to improve the dispersion of CHA zeolite particles, the suspension was stirred at room temperature for 24 h. After centrifugation, the thus-treated CHA zeolite was washed three times with 45 mL of deionized water using a centrifuge to remove physisorbed species. The resulting sample was treated in the same manner once more. After drying at 333 K overnight, the solid was dissolved in an aqueous HF solution in the same manner as described in Experimental section 4. The resulting solutions were analyzed by ICP-AES to directly quantify the uptake of Sr<sup>2+</sup> introduced on the surface of each CHA zeolite.

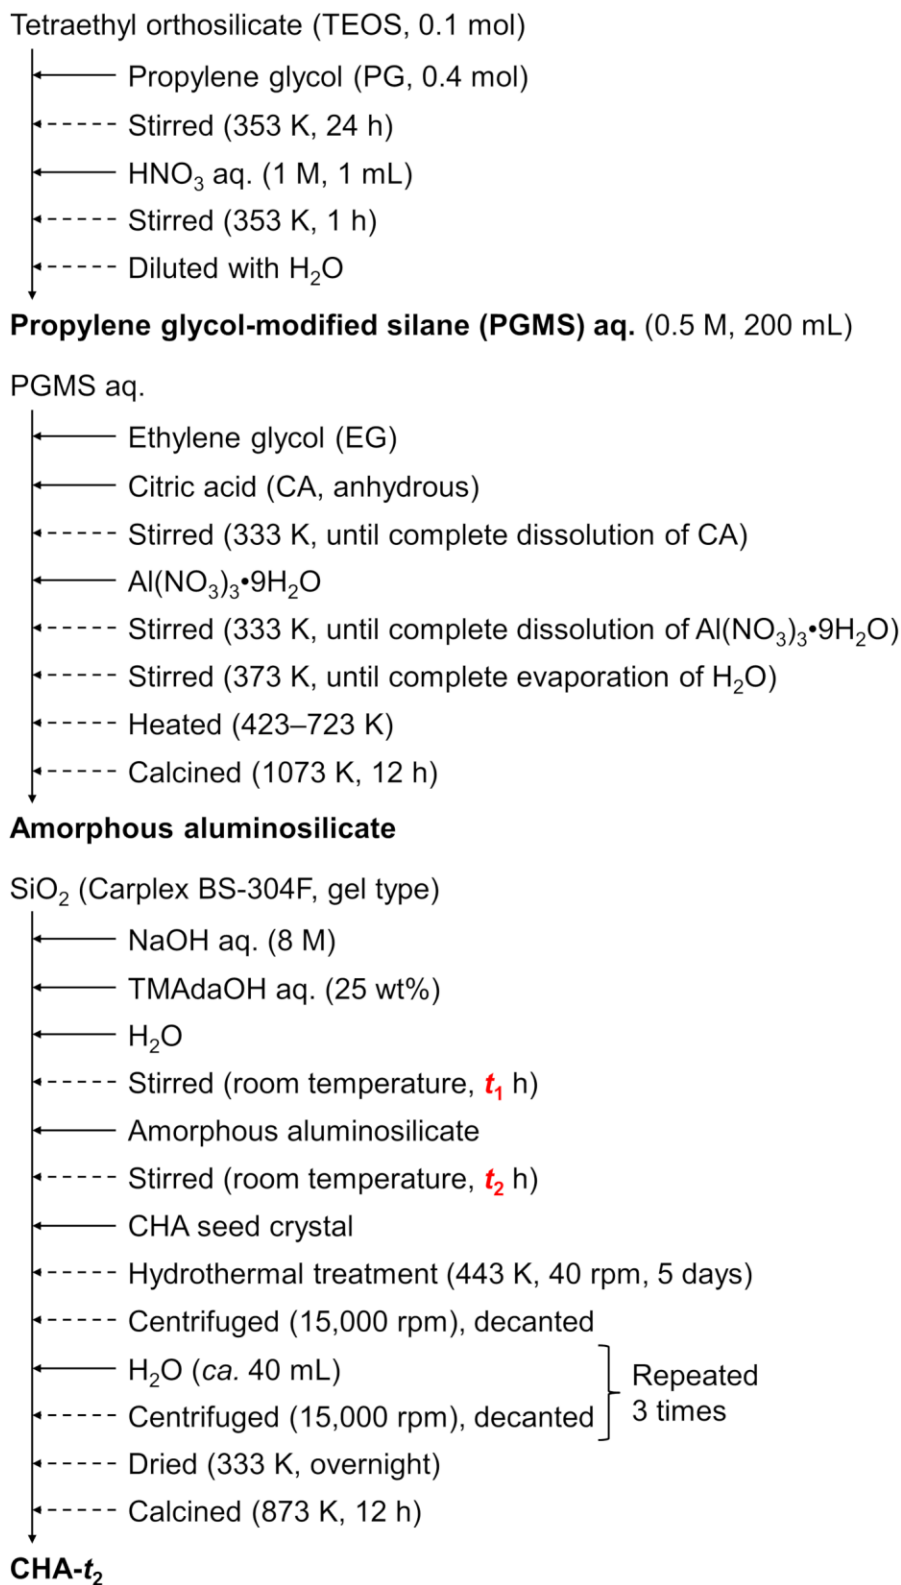

**Fig. S1** Procedure for synthesizing CHA-*t*<sub>2</sub> samples.

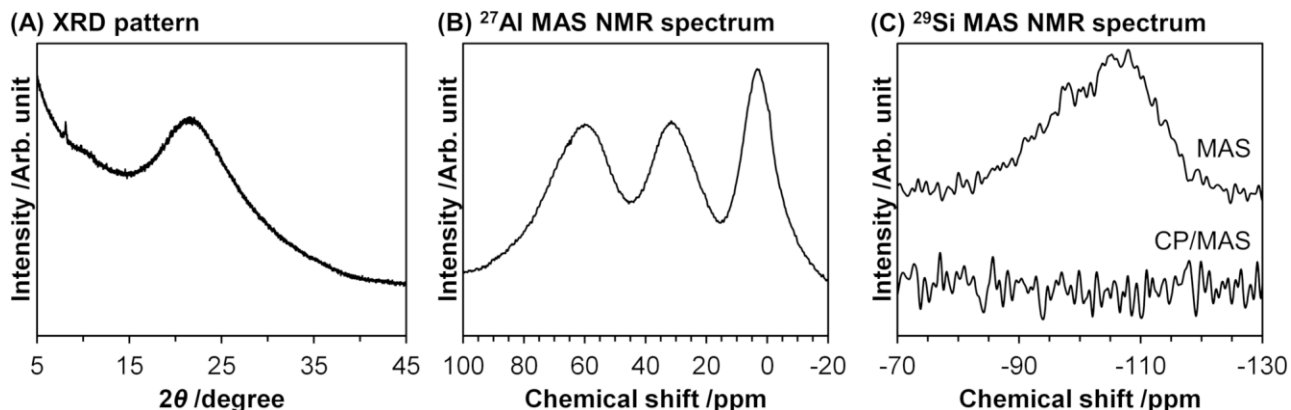

**Fig. S2** Textural properties of Al-rich aluminosilicate prepared via the polymerized complex method, determined by (A) powder XRD, (B) <sup>27</sup>Al MAS NMR, and (C) <sup>29</sup>Si MAS NMR with/without the CP technique. These data were taken from our previous paper (Ref. S2).

The halo at *ca.* 22° observed in the XRD pattern (Fig. S2A) and the absence of any other diffraction peaks indicated the formation of amorphous aluminosilicate. The peaks at 60, 30, and 0 ppm in the <sup>27</sup>Al MAS NMR spectrum in Fig. S2B indicated the presence of tetra-, penta-, and hexa-coordinated Al species, respectively.<sup>S5,S6</sup> In the <sup>29</sup>Si MAS NMR spectrum (Fig. S2C), the broad signal is assignable to Q<sup>4</sup>(0Al) at -115 ppm, Q<sup>4</sup>(1Al) at -108 ppm, Q<sup>4</sup>(2Al) at -102 ppm, Q<sup>4</sup>(3Al) at -95.7 ppm, and Q<sup>4</sup>(4Al) at -87.5 ppm.<sup>S5</sup> The absence of any peaks in the <sup>29</sup>Si CP/MAS NMR spectrum indicated that no Si(OT)<sub>4-y</sub>(OH)<sub>y</sub> (T = Si or Al, 1 ≤ y ≤ 3) species had formed.

**Table S1** Proportion of Q<sup>4</sup>(nAl) species in amorphous Al-rich aluminosilicate.<sup>a</sup>

| Q <sup>4</sup> (0Al) | Q <sup>4</sup> (1Al) | Q <sup>4</sup> (2Al) | Q <sup>4</sup> (3Al) | Q <sup>4</sup> (4Al) |
|----------------------|----------------------|----------------------|----------------------|----------------------|
| 26                   | 25                   | 19                   | 17                   | 13                   |

<sup>a</sup> Examined via deconvolution of <sup>29</sup>Si MAS NMR spectrum shown in Fig. S2C.

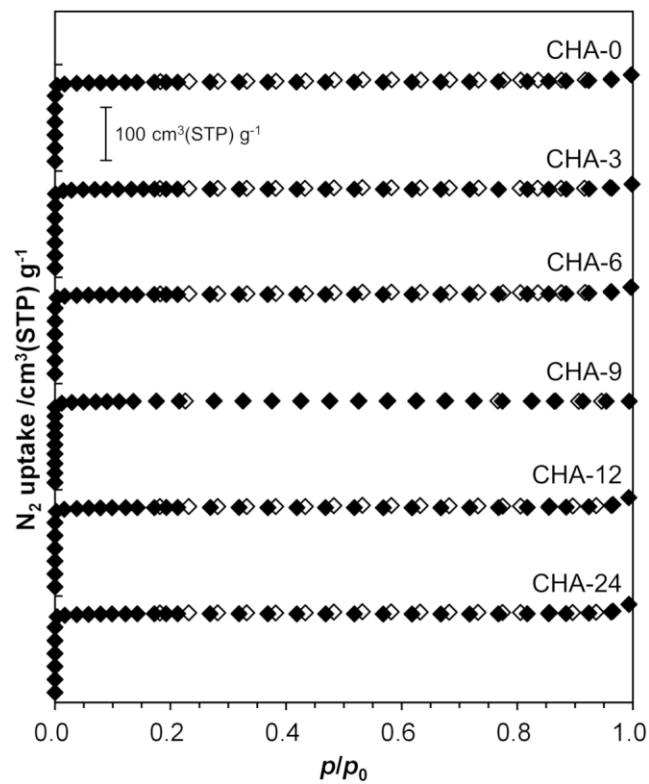

**Fig. S3** N<sub>2</sub> physisorption isotherms for CHA-*t*<sub>2</sub>, recorded at 77 K. The filled and open dots show the adsorption and desorption branches, respectively.



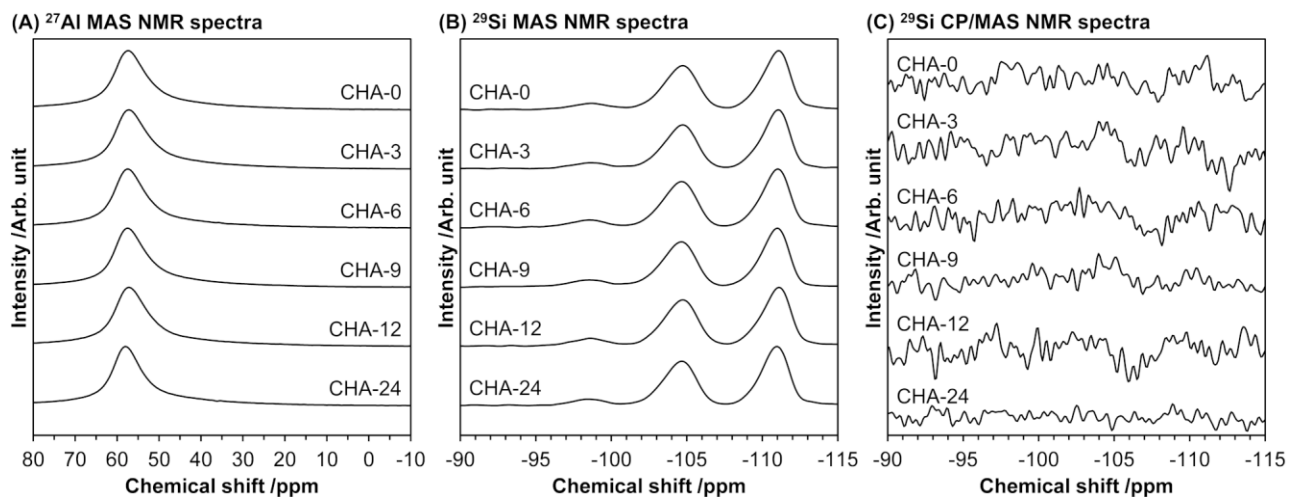

**Fig. S4** Coordination structure of Al and Si species involved in CHA-*t*<sub>2</sub>, examined by NMR spectroscopy: (A) <sup>27</sup>Al MAS NMR spectra; (B) <sup>29</sup>Si MAS NMR spectra; and (C) <sup>29</sup>Si CP/MAS NMR spectra. The deconvolution results for the <sup>29</sup>Si MAS NMR spectra are shown in Fig. S5.

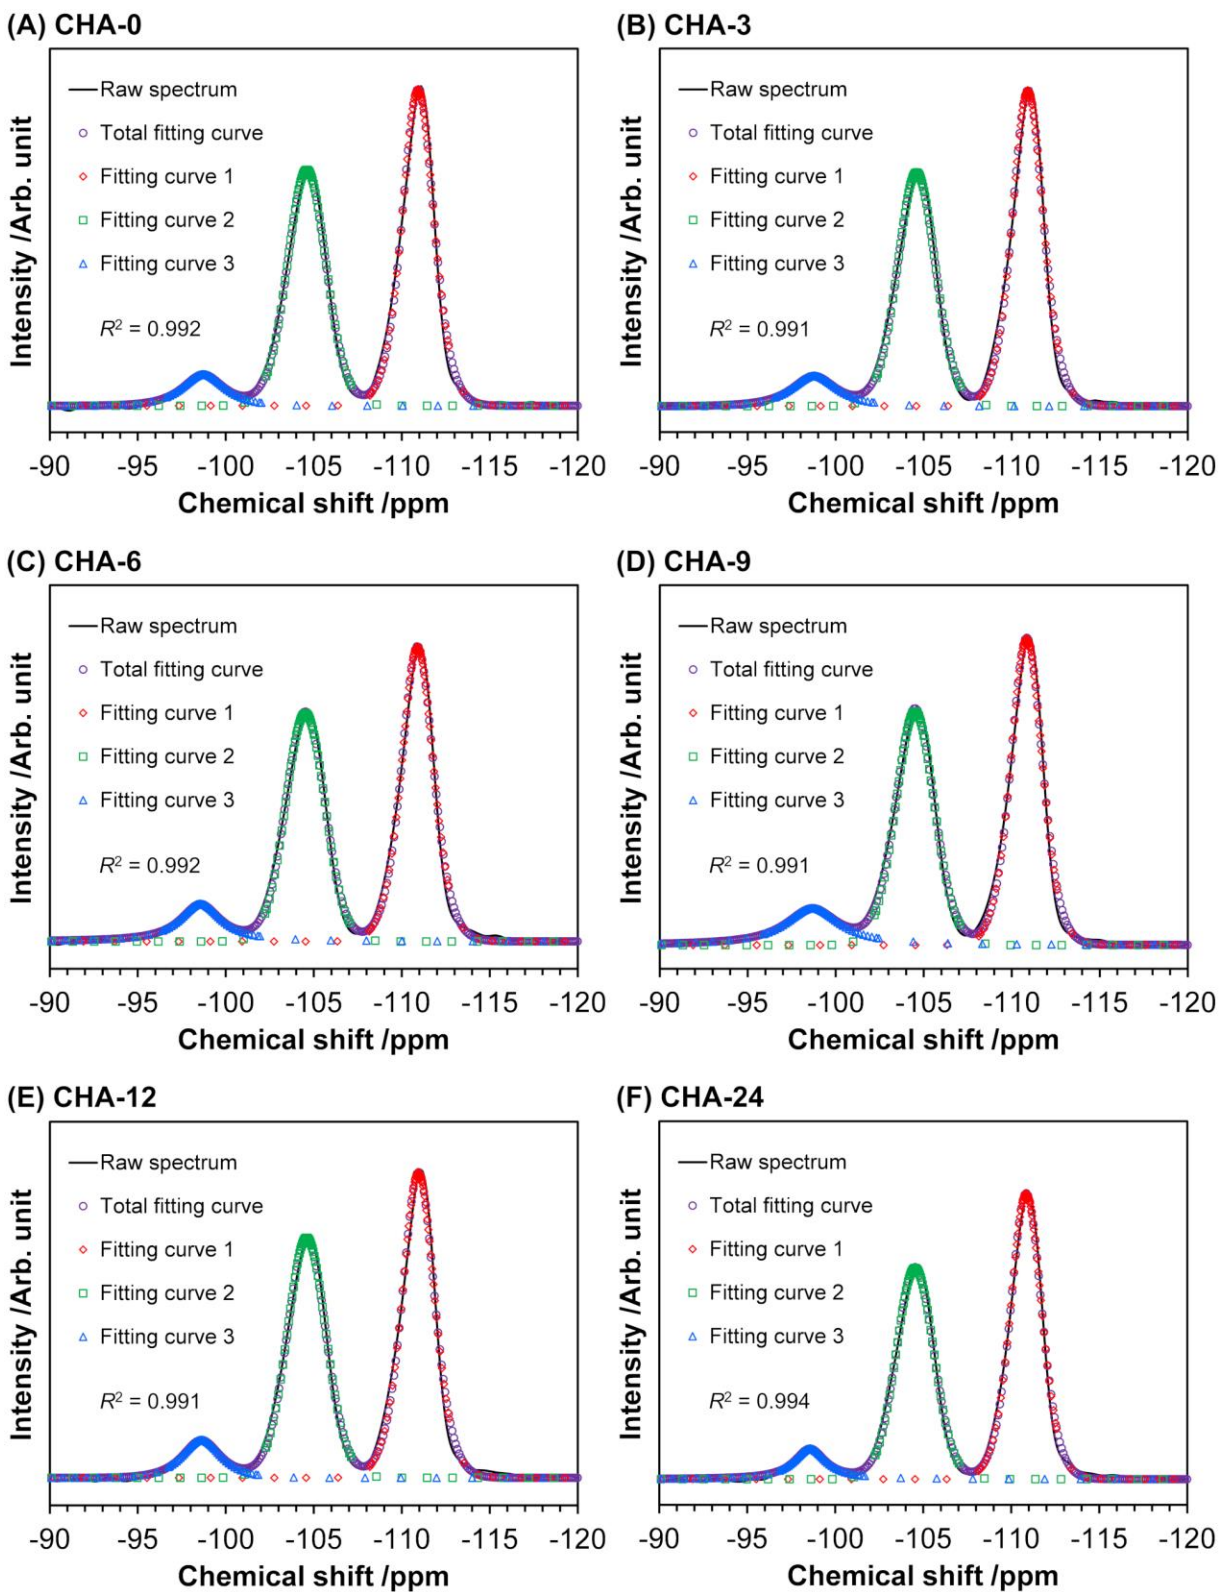

**Fig. S5** Deconvolution results for  $^{29}\text{Si}$  MAS NMR spectra for CHA- $t_2$ : (A) CHA-0; (B) CHA-3; (C) CHA-6; (D) CHA-9; (E) CHA-12; and (F) CHA-24.

**Table S2** Proportion of Al-containing Q<sup>4</sup>(nAl) species in high-silica **CHA**-type zeolites in reported works.

| Sample name<br>in each paper | SDAs                                                             | Si/Al <sup>a</sup> | Proportion of<br>Al-containing Q <sup>4</sup> (2Al) <sup>b</sup> /% |                      | Reference |
|------------------------------|------------------------------------------------------------------|--------------------|---------------------------------------------------------------------|----------------------|-----------|
|                              |                                                                  |                    | Q <sup>4</sup> (1Al)                                                | Q <sup>4</sup> (2Al) |           |
| CHA-9                        | TMAda <sup>+</sup> , Na <sup>+</sup>                             | 5.7                | 77                                                                  | 23                   | This work |
| CHA-4 <sup>c</sup>           | TMAda <sup>+</sup> , Na <sup>+</sup>                             | 7.6 <sup>e</sup>   | 73                                                                  | 27                   | S7        |
| CHA-F-1.0 <sup>c</sup>       | TMAda <sup>+</sup> , Na <sup>+</sup>                             | 13.5 <sup>f</sup>  | 70                                                                  | 30                   | S8        |
| CHA-FAU-TEA <sup>c</sup>     | TEA <sup>+</sup> , Na <sup>+</sup> , K <sup>+</sup> <sup>d</sup> | 6.3 <sup>f</sup>   | 82                                                                  | 18                   | S9        |

<sup>a</sup> Molar ratio of Si to Al.

<sup>b</sup> Estimated from the areas of each Q<sup>4</sup>(nAl) peak in <sup>29</sup>Si MAS NMR spectra: (Proportion of Al-containing Q<sup>4</sup>(nAl) (n = 1 or 2)) = (Peak area for Q<sup>4</sup>(nAl)) / ((Peak area for Q<sup>4</sup>(1Al)) + (Peak area for Q<sup>4</sup>(2Al))).

<sup>c</sup> Synthesized via the interzeolite conversion from Al-rich **FAU**-type zeolites.

<sup>d</sup> TEA<sup>+</sup> = tetraethylammonium cation.

<sup>e</sup> Determined by <sup>29</sup>Si MAS NMR.

<sup>f</sup> Quantified by ICP-AES.

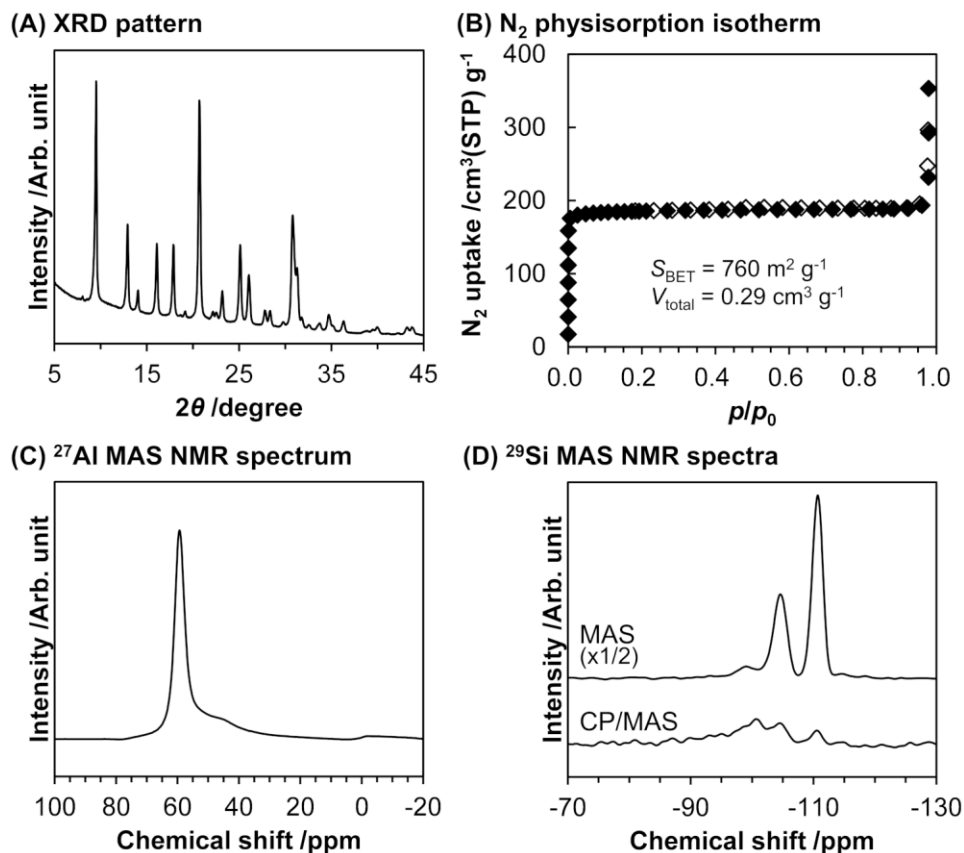

**Fig. S6** Characterization data of SSZ-13: (A) XRD pattern, (B) N<sub>2</sub> physisorption isotherm, (C) <sup>27</sup>Al MAS NMR spectrum, and (D) <sup>29</sup>Si MAS NMR spectra recorded with/without CP technique. In Fig. S6B, the filled and open dots show the adsorption and desorption branches, respectively.

The ICP-AES measurement for SSZ-13, whose framework was confirmed to be **CHA** type by XRD (Fig. S6A), determined its Si/Al ratio to be 7.1. The BET specific surface area and total pore volume of SSZ-13 were 760 m<sup>2</sup> g<sup>-1</sup> and 0.29 cm<sup>3</sup> g<sup>-1</sup> (Fig. S6B), respectively, both slightly higher than those of CHA-*t*<sub>2</sub> (see Table 1). The <sup>27</sup>Al MAS NMR spectrum in Fig. S6C revealed the presence of intra-framework Al species with slight amounts of penta- and hexa-coordinated Al species.<sup>S5,S6</sup> The <sup>29</sup>Si MAS NMR spectrum (the upper spectrum in Fig. S6D) suggested the presence of Q<sup>4</sup>(0Al), Q<sup>4</sup>(1Al), and Q<sup>4</sup>(2Al) species,<sup>S5</sup> yet the spectrum recorded with the CP technique (the bottom spectrum in Fig. S6D) indicated that a certain amount of Si(OT)<sub>4-y</sub>(OH)<sub>y</sub> (T = Si or Al, 1 ≤ y ≤ 3) species was also involved in SSZ-13 and their peaks overlapped with those of Q<sup>4</sup>(nAl) in the upper spectrum of Fig. S6D, making the accurate evaluation of the Q<sup>4</sup>(2Al) proportion impossible. If we completely ignored such issue, the proportion of Q<sup>4</sup>(2Al) to the total Al-containing Q<sup>4</sup>(nAl) species for SSZ-13 was estimated to be at most 20% (note that the actual value must be lower than 20%), which is lower than the highest value achieved in this study (*i.e.*, 23% for CHA-9, see Table 1).

### Supplementary references

- S1. M. Kakihana and M. Yoshimura, *Bull. Chem. Soc. Jpn.*, 1999, **72**, 1427–1443.
- S2. T. Xiao, M. Yabushita, T. Nishitoba, R. Osuga, M. Yoshida, M. Matsubara, S. Maki, K. Kanie, T. Yokoi, W. Cao and A. Muramatsu, *ACS Omega*, 2021, **6**, 5176–5182.
- S3. K. Yoshizawa, H. Kato and M. Kakihana, *J. Mater. Chem.*, 2012, **22**, 17272–17277.
- S4. R. Osuga, T. Yokoi and J. N. Kondo, *J. Catal.*, 2019, **371**, 291–297.
- S5. M. Haouas, F. Taulelle and C. Martineau, *Prog. Nucl. Magn. Reson. Spectrosc.*, 2016, **94–95**, 11–36.
- S6. F. A. Perras, Z. Wang, T. Kobayashi, A. Baiker, J. Huang and M. Pruski, *Phys. Chem. Chem. Phys.*, 2019, **21**, 19529–19537.
- S7. D. E. Akporiaye, I. M. Dahl, H. B. Mostad and R. Wendelbo, *J. Phys. Chem.*, 1996, **100**, 4148–4153.
- S8. T. Nishitoba, N. Yoshida, J. N. Kondo and T. Yokoi, *Ind. Eng. Chem. Res.*, 2018, **57**, 3914–3922.
- S9. T. Nishitoba, T. Nozaki, S. Park, Y. Wang, J. N. Kondo, H. Gies and T. Yokoi, *Catalysts*, 2020, **10**, 1204.
